# Supplementary material for: Metabolic Derangement in Pediatric Patient with Obesity: The Role of Ketogenic Diet as Therapeutic Tool
Source: MDPI journal article supplement (doi:10.3390/nu13082805), 2021-08-16
Supplement: s1 [file s1]

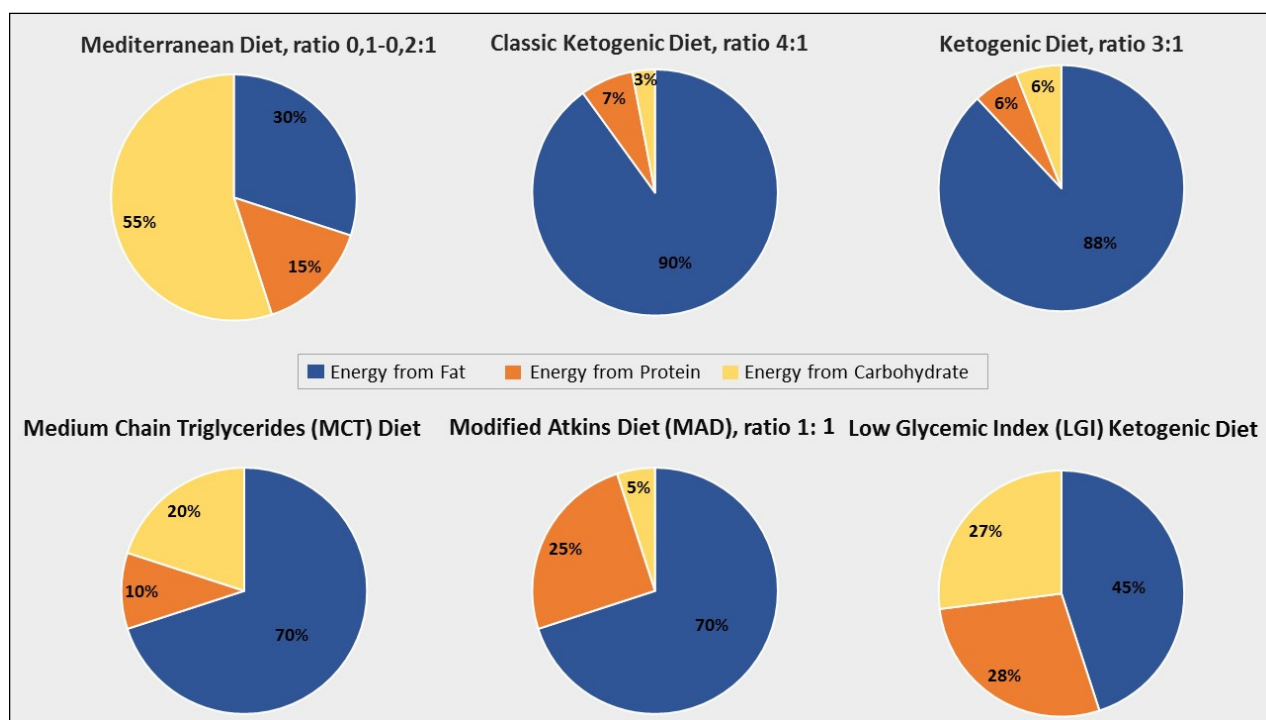

**Figure S1 .** Nutritional composition of different type of Ketogenic Diet compared to Mediterranean diet
